# Supplementary material
Source: PubMed Central journal article supplement (PMC3950815)
Supplement: NIHMS555158-supplement-ESI.pdf [file NIHMS555158-supplement-ESI.pdf]

Supplemental Information for:  
**Microgel Film Dynamics Modulate Cell Adhesion Behavior**

Shalini Saxena,<sup>†§</sup> Mark W. Spears Jr.,<sup>§</sup> Hiroaki Yoshida,<sup>§</sup> Jeffrey C. Gaulding, Andrés J. Garcia,<sup>‡\*</sup>  
L. Andrew Lyon\*

School of Chemistry and Biochemistry and the Petit Institute for Bioengineering and  
Bioscience, Georgia Institute of Technology, Atlanta, GA 30332, USA

<sup>§</sup> Equally Contributing Authors

<sup>†</sup> School of Materials Science and Engineering, Georgia Institute of Technology, Atlanta, GA  
30332, USA

<sup>‡</sup> George W. Woodruff School of Mechanical Engineering, Georgia Institute of Technology,  
Atlanta, GA 30332, USA

\*Corresponding Author  
Email: [lyon@gatech.edu](mailto:lyon@gatech.edu)  
Phone: (404) 894-4090

\*Corresponding Author  
Email: [andres.garcia@me.gatech.edu](mailto:andres.garcia@me.gatech.edu)  
Phone: (404) 894-9384

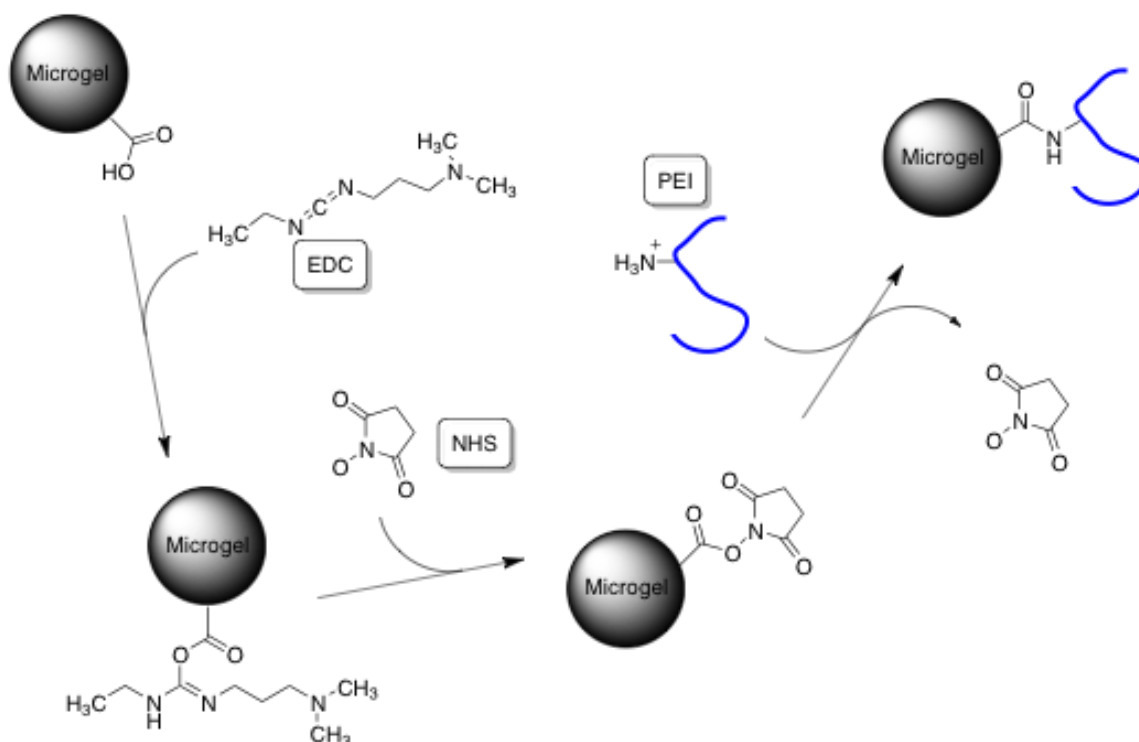

**Figure S1.** Reaction scheme for EDC/NHS film cross-linking treatment of PEI films.

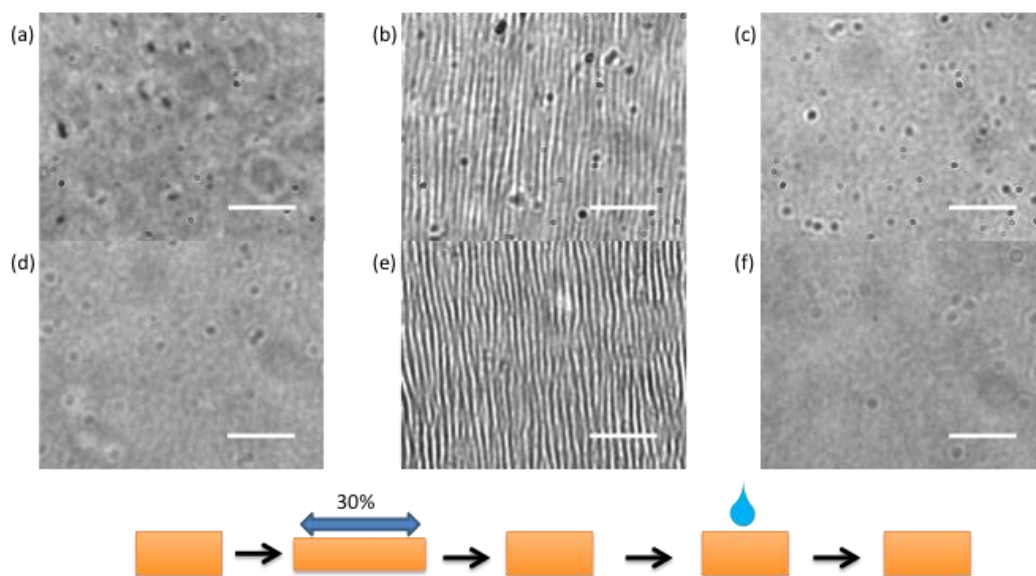

**Figure S2.** Brightfield microscopy images for self-healing assessment of BIS/pDADMAC 4 layer films after exposure to cell culture medium. (a-c) untreated (d-f) crosslink-treated. (a,d) before damage (b,e) after 30% linear strain applied (c,f) healed with water after damage.

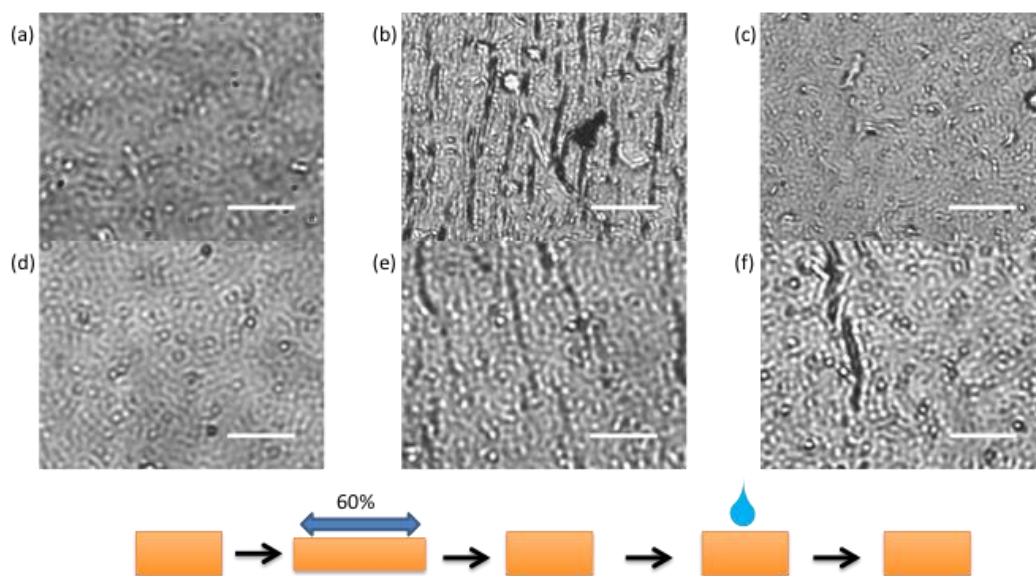

**Figure S3.** Brightfield microscopy images for self-healing assessment of BIS/PEI 4 layer films after exposure to cell culture medium. (a-c) untreated (d-f) crosslink-treated. (a,d) before damage (b,e) after 60% linear strain applied (c,f) healed with water after damage.

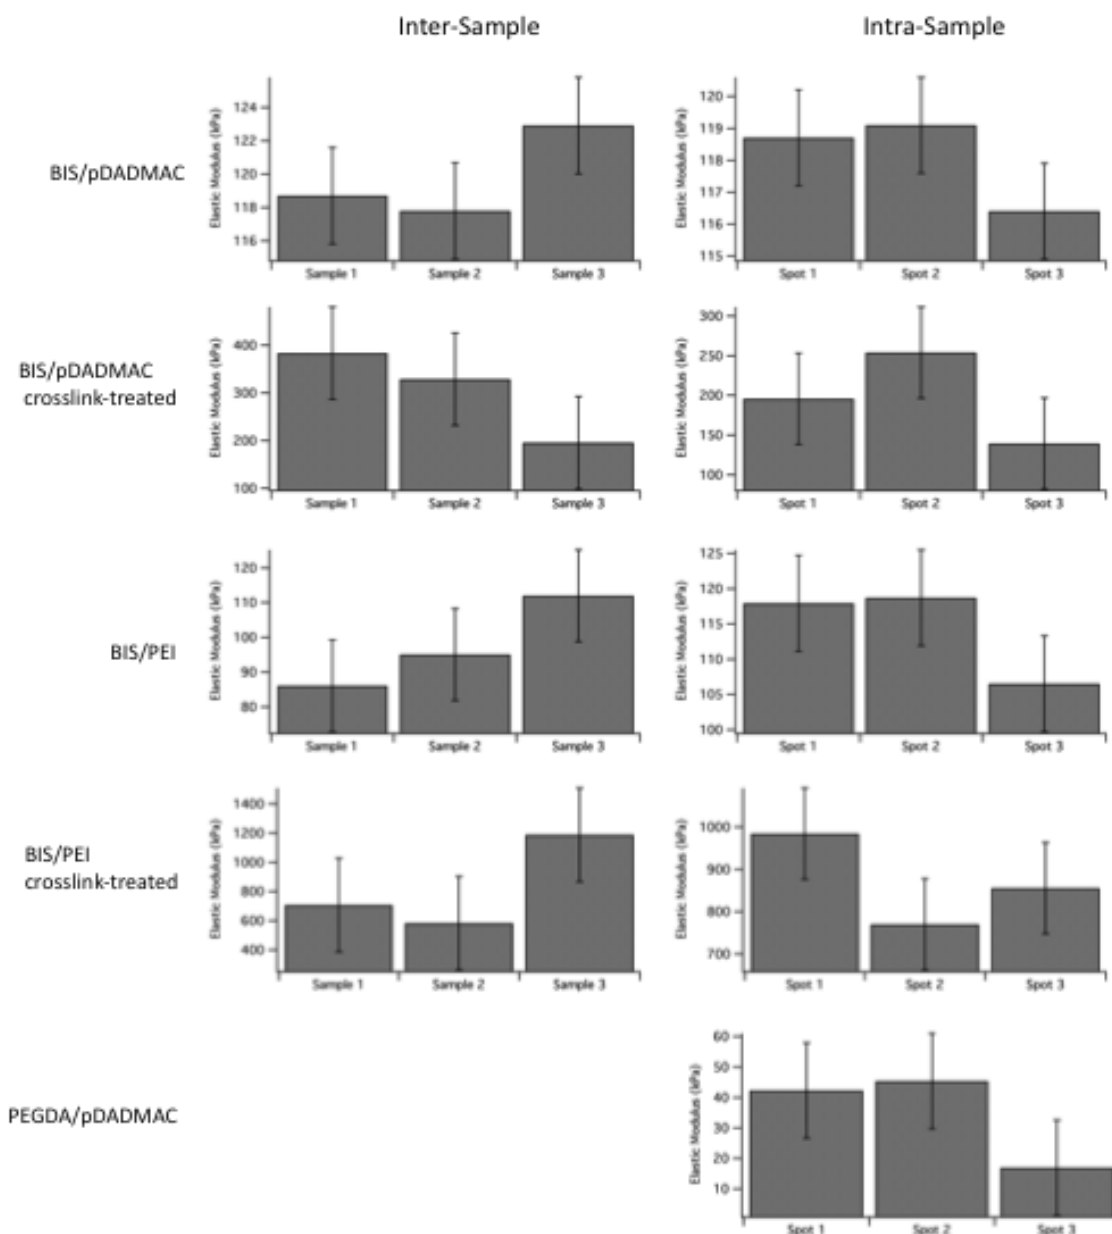

**Figure S4.** Intra- and inter-sample variability for AFM force maps for each type of film. Each column represents one force map with error bars representing the standard deviation of moduli within the map.

**Table S1.** Dynamic light scattering results for microgels used in this study. All data were collected at 25 °C in either PBS (pH 7.4) or Formate buffer (pH 3.0).

| Microgel           | $R_{Hr}$ nm (pH 3.0) | $R_{Hr}$ nm (pH 7.4) |
|--------------------|----------------------|----------------------|
| pNIPAm, BIS, Aac   | 239 ± 77             | 524 ± 104            |
| pNIPAm, PEGDA, Aac | 277 ± 25             | 510 ± 31             |

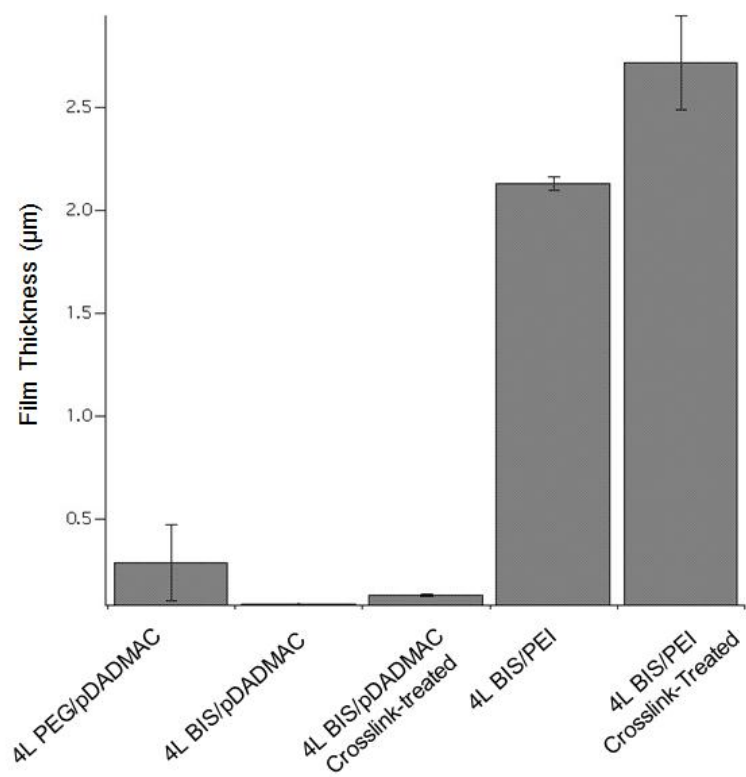

**Figure S5.** Film thickness as determined via atomic force microscopy in air.
